# Supplementary material
Source: PubMed Central journal article supplement (PMC4101648)

**Supplemental table 1.** Overview of proteins that were significantly increased or decreased in the hyperinsulinemic (INS) or prediabetic (IGT) groups of mice, as compared with the normal glucose tolerant control mice. Upon 2-DIGE analysis, proteins were identified by mass spectrometry as described in Materials and Methods. Membrane-associated proteins are highlighted.

| spot  | Protein Name                                            | FOLD CHANGE |      |      |
|-------|---------------------------------------------------------|-------------|------|------|
|       |                                                         | NGT         | INS  | IGT  |
| s2201 | <b>polymerase I and transcript release factor</b>       | 1.00        | 0.59 | 2.12 |
| s2632 | EH domain-containing protein 2                          | 1.00        | 0.77 | 2.01 |
| s2640 | EH domain-containing protein 2                          | 1.00        | 0.72 | 1.98 |
| s2448 | Astrotactin 1                                           | 1.00        | 0.87 | 1.95 |
| s2197 | <b>polymerase I and transcript release factor</b>       | 1.00        | 0.59 | 1.75 |
| s2244 | delta(3,5)-Delta(2,4)-dienoyl-CoA isomerase             | 1.00        | 1.10 | 1.73 |
| s2189 | <b>polymerase I and transcript release factor</b>       | 1.00        | 0.73 | 1.71 |
| s2254 | estradiol 17-beta-dehydrogenase 8                       | 1.00        | 1.22 | 1.60 |
| s2613 | E3 ubiquitin-protein ligase TTC3                        | 1.00        | 0.99 | 1.55 |
| s1906 | Short-chain acyl-CoA dehydrogenase, mitochondrial       | 1.00        | 1.22 | 1.54 |
| s1709 | adenosine kinase                                        | 1.00        | 0.99 | 1.52 |
| s1166 | Heat shock protein 8                                    | 1.00        | 0.91 | 1.52 |
| s1513 | ATP synthase subunit beta,                              | 1.00        | 0.89 | 1.50 |
| s2479 | annexin A1                                              | 1.00        | 1.23 | 1.49 |
| s1177 | albumin precursor                                       | 1.00        | 1.11 | 1.49 |
| s1112 | Heat shock protein 8                                    | 1.00        | 0.99 | 1.47 |
| s1521 | aldehyde dehydrogenase, mitochondrial precursor         | 1.00        | 1.17 | 1.47 |
| s2191 | <b>polymerase I and transcript release factor</b>       | 1.00        | 0.58 | 1.47 |
| s1649 | cytochrome b-c1 complex subunit 1, mitochondrial        | 1.00        | 0.96 | 1.46 |
| s1309 | Serpina1a                                               | 1.00        | 0.96 | 1.46 |
| s1353 | vitamin D-binding protein                               | 1.00        | 1.10 | 1.45 |
| s1759 | gamma-actin                                             | 1.00        | 0.99 | 1.42 |
| s1527 | aldehyde dehydrogenase, mitochondrial precursor         | 1.00        | 1.09 | 1.42 |
| s1377 | protein disulfide-isomerase A3 precursor                | 1.00        | 1.08 | 1.40 |
| s1173 | albumin precursor                                       | 1.00        | 0.97 | 1.40 |
| s1171 | albumin precursor                                       | 1.00        | 1.03 | 1.40 |
| s2051 | alpha-2-macroglobulin precursor                         | 1.00        | 1.20 | 1.39 |
| s2050 | albumin precursor                                       | 1.00        | 1.08 | 1.39 |
| s1298 | Protein phosphatase 2 (formerly 2A), regulatory subunit | 1.00        | 1.20 | 1.39 |
| s1085 | propionyl CoA-carboxylase alpha-subunit                 | 1.00        | 1.16 | 1.38 |
| s717  | albumin precursor                                       | 1.00        | 1.12 | 1.38 |
| s1480 | selenium-binding protein                                | 1.00        | 1.13 | 1.37 |
| s1168 | albumin precursor                                       | 1.00        | 1.12 | 1.36 |
| s1503 | dihydrolipoyllysine-residue succinyltransferase         | 1.00        | 1.11 | 1.33 |
| s1745 | vimentin                                                | 1.00        | 0.91 | 1.33 |
| s2031 | pyridoxal kinase                                        | 1.00        | 1.04 | 1.29 |
| s2307 | serum amyloid P-component precursor                     | 1.00        | 1.82 | 1.29 |
| s2357 | guanidinoacetate N-methyltransferase                    | 1.00        | 0.92 | 1.28 |
| s2056 | guanine nucleotide binding protein, beta 1              | 1.00        | 1.06 | 1.25 |
| s1482 | <b>selenium-binding protein 1</b>                       | 1.00        | 0.93 | 1.24 |
| s2445 | apolipoprotein A-I                                      | 1.00        | 2.37 | 1.24 |
| s1951 | trans-1,2-dihydrobenzene-1,2-diol dehydrogenase         | 1.00        | 1.13 | 1.23 |
| s1174 | Heat shock protein 8                                    | 1.00        | 0.94 | 1.22 |
| s1472 | <b>selenium-binding protein 1</b>                       | 1.00        | 1.06 | 1.20 |
| s2139 | <b>polymerase I and transcript release factor</b>       | 1.00        | 0.66 | 1.20 |
| s2131 | <b>polymerase I and transcript release factor</b>       | 1.00        | 0.67 | 1.19 |

|       |                                                       |      |      |      |
|-------|-------------------------------------------------------|------|------|------|
| s1481 | selenium-binding protein 1                            | 1.00 | 0.91 | 1.19 |
| s2495 | peroxiredoxin-2                                       | 1.00 | 0.88 | 1.18 |
| s561  | vinculin                                              | 1.00 | 0.81 | 1.17 |
| s2143 | <b>polymerase I and transcript release factor</b>     | 1.00 | 0.64 | 1.17 |
| s1895 | vimentin                                              | 1.00 | 0.65 | 1.17 |
| s1558 | aldehyde dehydrogenase                                | 1.00 | 3.01 | 1.16 |
| s1103 | 78 kDa glucose-regulated protein precursor            | 1.00 | 0.81 | 1.13 |
| s2321 | <b>polymerase I and transcript release factor</b>     | 1.00 | 0.98 | 1.13 |
| s2145 | <b>polymerase I and transcript release factor</b>     | 1.00 | 0.67 | 1.13 |
| s2212 | Electron transferring flavoprotein, alpha polypeptide | 1.00 | 0.92 | 1.13 |
| s2339 | proteasome activator complex subunit 1                | 1.00 | 1.75 | 1.13 |
| s1332 | epoxide hydrolase 2                                   | 1.00 | 0.86 | 1.13 |
| s1962 | Cavin-3                                               | 1.00 | 0.80 | 1.12 |
| s2352 | proteasome subunit alpha type-5                       | 1.00 | 1.42 | 1.11 |
| s2070 | <b>polymerase I and transcript release factor</b>     | 1.00 | 0.60 | 1.10 |
| s1896 | aldehyde dehydrogenase 2                              | 1.00 | 1.29 | 1.10 |
| s2207 | Gamma-actin                                           | 1.00 | 1.79 | 1.07 |
| s1835 | septin-2 b                                            | 1.00 | 0.70 | 1.04 |
| s2063 | Serpina1a                                             | 1.00 | 1.69 | 1.01 |
| s1711 | beta-centractin                                       | 1.00 | 0.87 | 1.01 |
| s2373 | immunoglobulin light chain variable region            | 1.00 | 0.55 | 1.00 |
| s1108 | 78 kDa glucose-regulated protein precursor            | 1.00 | 0.74 | 0.96 |
| s2161 | annexin A6 isoform a                                  | 1.00 | 1.73 | 0.94 |
| s2369 | immunoglobulin kappa light chain variable region      | 1.00 | 1.59 | 0.93 |
| s1421 | Aldehyde dehydrogenase 3 family, member B1            | 1.00 | 1.64 | 0.93 |
| s2002 | Cavin-3                                               | 1.00 | 0.80 | 0.92 |
| s2519 | <b>polymerase I and transcript release factor</b>     | 1.00 | 2.55 | 0.87 |
| s963  | albumin precursor                                     | 1.00 | 1.31 | 0.86 |
| s1458 | Serpina1a                                             | 1.00 | 1.36 | 0.84 |
| s2168 | annexin A5                                            | 1.00 | 1.34 | 0.84 |
| s1575 | ribonuclease inhibitor isoform a                      | 1.00 | 1.21 | 0.84 |
| s1495 | Serpina1a                                             | 1.00 | 1.41 | 0.79 |
| s960  | albumin precursor                                     | 1.00 | 1.17 | 0.79 |
| s2773 | Ferritin light chain 1                                | 1.00 | 1.14 | 0.79 |
| s2378 | HIRA-interacting protein (HIRIP5)                     | 1.00 | 1.56 | 0.79 |
| s1765 | BiP                                                   | 1.00 | 2.46 | 0.77 |
| s1486 | Serpina1a                                             | 1.00 | 1.53 | 0.77 |
| s1511 | Serpina1c                                             | 1.00 | 1.42 | 0.75 |
| s2393 | peroxiredoxin-6                                       | 1.00 | 0.67 | 0.75 |
| s1528 | Serpina1a                                             | 1.00 | 1.44 | 0.74 |
| s2768 | ferritin heavy chain                                  | 1.00 | 1.22 | 0.73 |
| s2126 | annexin A6                                            | 1.00 | 1.05 | 0.72 |
| s1388 | protein disulfide-isomerase A3 precursor              | 1.00 | 1.33 | 0.70 |
| s2180 | annexin A5                                            | 1.00 | 1.87 | 0.69 |
| s1903 | haptoglobin precursor                                 | 1.00 | 0.57 | 0.60 |

**Supplemental table 2.** Mean log standardized abundance values (LSA)  $\pm$  SEM for the PTRF isoforms found in the 2D-DIGE analysis. The zero value for LSA corresponds to the internal standard as described in material and methods.

| spot  | Protein Name                               | NGT (LSA)          | INS (LSA)          | IGT (LSA)          |
|-------|--------------------------------------------|--------------------|--------------------|--------------------|
| s2321 | polymerase I and transcript release factor | -0.003 $\pm$ 0.026 | -0.013 $\pm$ 0.025 | 0.052 $\pm$ 0.02   |
| s2145 | polymerase I and transcript release factor | 0.009 $\pm$ 0.072  | -0.164 $\pm$ 0.057 | 0.062 $\pm$ 0.05   |
| s2143 | polymerase I and transcript release factor | -0.006 $\pm$ 0.054 | -0.197 $\pm$ 0.052 | 0.064 $\pm$ 0.064  |
| s2070 | polymerase I and transcript release factor | 0.025 $\pm$ 0.063  | -0.2 $\pm$ 0.083   | 0.066 $\pm$ 0.046  |
| s2139 | polymerase I and transcript release factor | 0.003 $\pm$ 0.045  | -0.178 $\pm$ 0.052 | 0.082 $\pm$ 0.058  |
| s2131 | polymerase I and transcript release factor | 0.024 $\pm$ 0.034  | -0.152 $\pm$ 0.064 | 0.1 $\pm$ 0.073    |
| s2197 | polymerase I and transcript release factor | -0.128 $\pm$ 0.085 | -0.36 $\pm$ 0.104  | 0.114 $\pm$ 0.081  |
| s2191 | polymerase I and transcript release factor | -0.025 $\pm$ 0.054 | -0.264 $\pm$ 0.081 | 0.141 $\pm$ 0.093  |
| s2189 | polymerase I and transcript release factor | -0.084 $\pm$ 0.076 | -0.219 $\pm$ 0.068 | 0.149 $\pm$ 0.084  |
| s2201 | polymerase I and transcript release factor | -0.13 $\pm$ 0.112  | -0.363 $\pm$ 0.115 | 0.197 $\pm$ 0.106  |
| s2519 | polymerase I and transcript release factor | -0.166 $\pm$ 0.033 | 0.241 $\pm$ 0.115  | -0.227 $\pm$ 0.015 |

**Supplemental Figure 1.** Two day confluent 3T3-L1 cells stably overexpressing PTRF (PTRF cells) or the empty vector (CONTROL) were differentiated into adipocytes, harvested at different time points, and then analyzed with propidium iodide staining to assess cell cycle distribution by FACS analysis. Results are expressed as mean  $\pm$  SEM of two independent experiments.

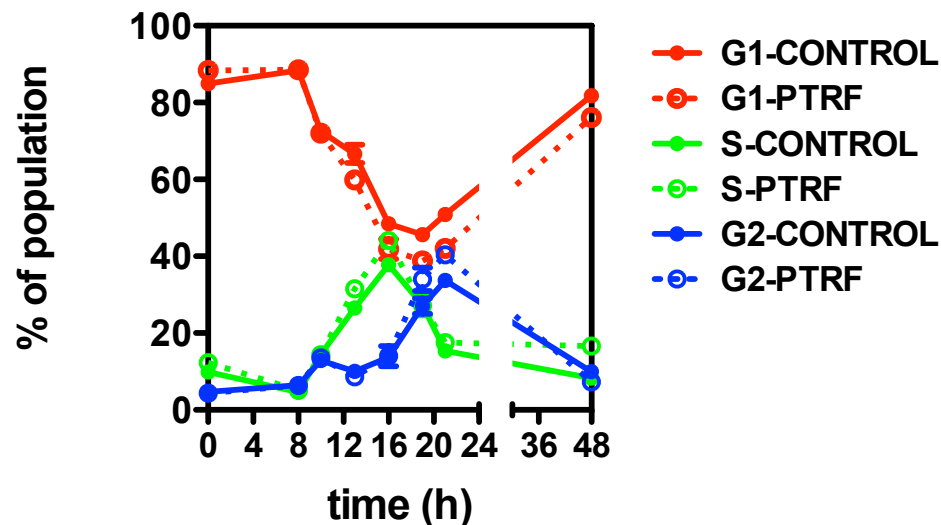

Supplement: supp_fj.14-251165_14-251165SuppData.pdf [file supp_fj.14-251165_14-251165SuppData.pdf]
